# Supplementary material
Source: Frontiers journal article supplement (https://www.frontiersin.org/articles/418702)
Supplement: Data_Sheet_1.PDF [file Data_Sheet_1.PDF]

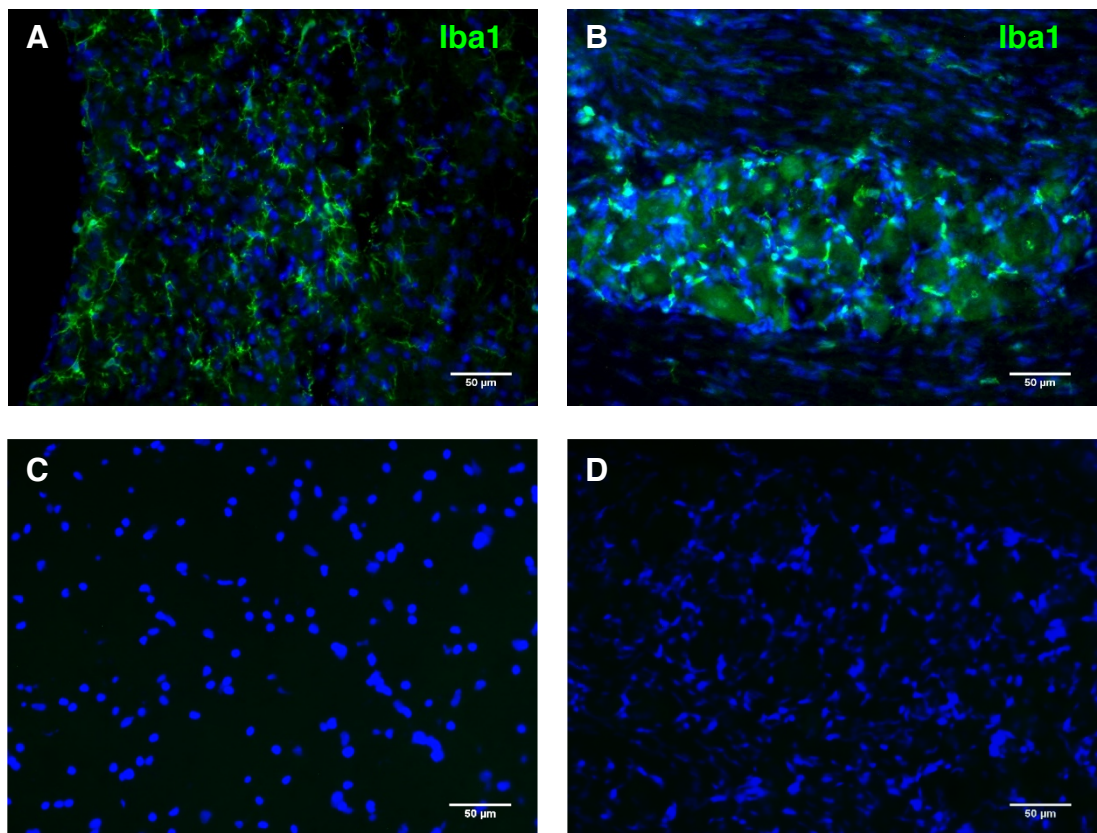

**Supplementary Figure 1. Specificity of Iba1 immunostaining.**

(A, B) Iba1 immunofluorescence staining (green) in the brainstem (A) and TG (B) of CFA-injected rats. (C, D) The specificity of anti-Iba1 primary antibody was determined by incubating slices from brainstem (C) and TG (D) of CFA-injected rats with secondary antibody only. Nuclei were labeled with the Hoechst33258 dye (blue). Scale bars: 50 μM.
